# Supplementary material
Source: Springer Nature journal article supplement (https://www.springermedizin.de/resource/supplementary/13054_2012_557_MOESM1_ESM.pdf/9708806)
Supplement: MOESM1 [file 9708806]

Time

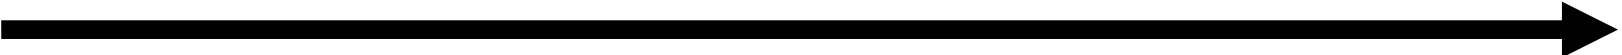

H0

H1

H2

H3

H4

H5

PSV

ASV

ASV-CO<sub>2</sub>

ASV-CO<sub>2</sub>-O<sub>2</sub>

PSV

Servo i Maquet Ventilator

S1 Hamilton Medical Ventilator

Servo i Maquet Ventilator
